# Supplementary figures and images for: Physiological and Transcriptomic Analyses Reveal Commonalities and Specificities in Wheat in Response to Aluminum and Manganese
Source: MDPI journal article supplement (doi:10.3390/cimb46010024), 2024-01-02

Scale independence

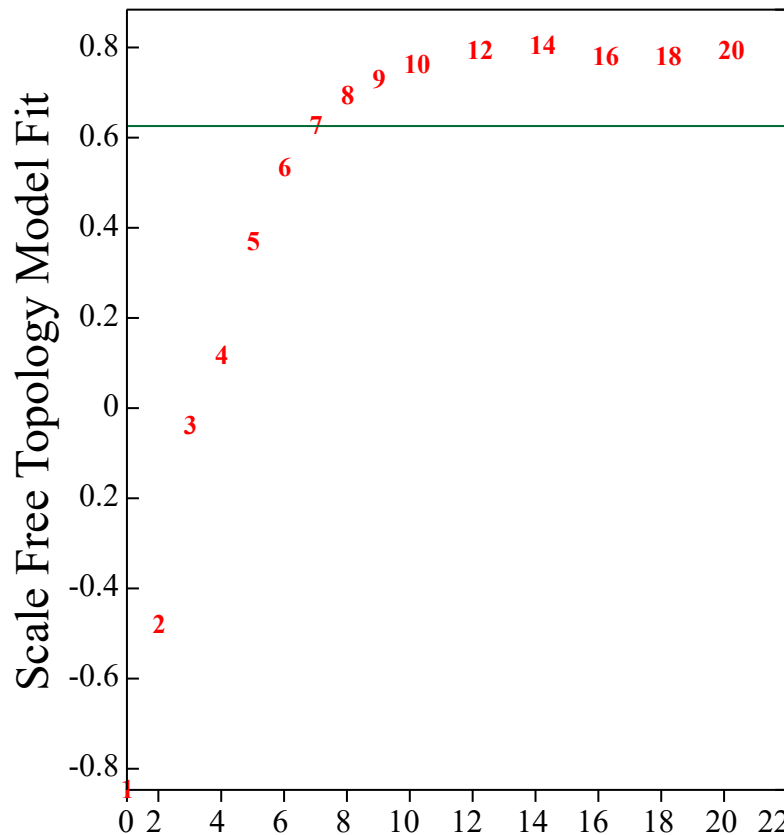

Mean Connectivity

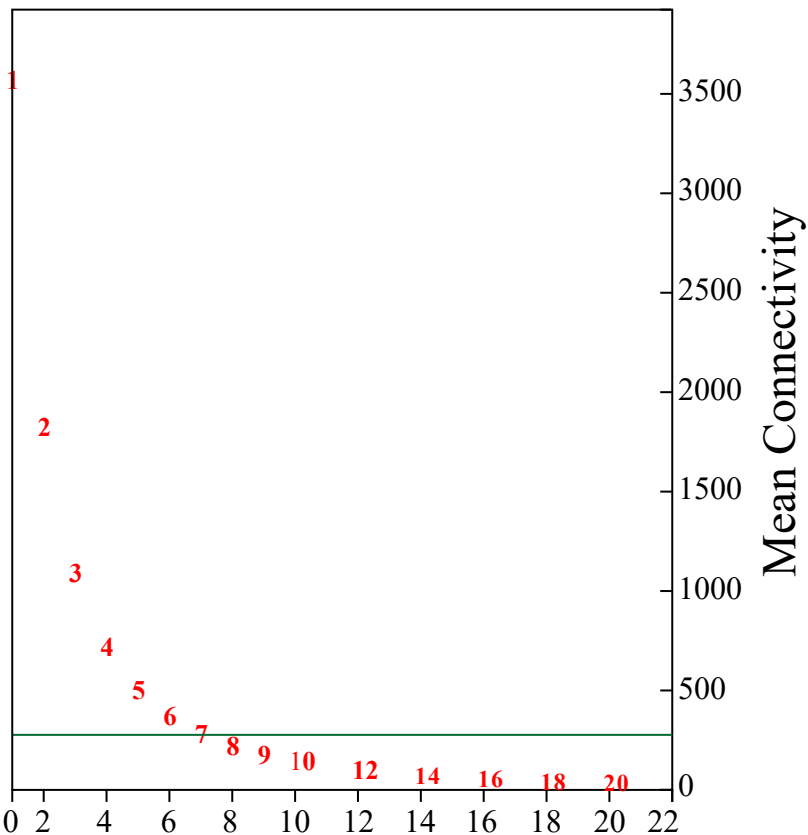

Soft Threshold (power)

Supplement: s1 [file s1]
